# Supplementary material for: Study on the Interaction between Soil and the Five-Claw Combination of a Mole Using the Discrete Element Method
Source: Appl Bionics Biomech. 2018 Aug 6;2018:7854052. doi: 10.1155/2018/7854052 (PMC6109513; doi:10.1155/2018/7854052)
Supplement: Supplementary 1 — Table S1: an example of force curves from the simulation (working speed = 3 m/s; rake angle = 90°). The draught and vertical forces recorded along the travelling distance of the five-claw combination during the interaction with soil at the speed of 3 m/s and rake angle of 90°. [file 7854052.f1.xlsx]

## Sheet: Force curves
An example of force curves from the simulation (working speed=3m/s; rake angle=90°)
Distance (mm)	Draught Forces (N)	Vertical Forces (N)
0	0	0
1.26	0	0
1.32	0	0
2.76	0	0
4.26	0	0
5.76	0	0
6.3	0	0
7.26	0	0
8.76	0	0
10.26	0	0
11.76	6.34671	1.36117
13.26	189.586	-15.6052
14.76	307.029	41.4007
16.26	136.844	13.0365
17.76	309.289	17.3401
19.26	278.919	18.9651
20.76	241.245	17.3654
22.26	309.525	49.043
23.76	305.096	28.6349
25.26	264.568	24.4459
26.76	260.017	30.8262
28.26	245.398	28.2202
29.76	380.697	91.5879
31.26	278.62	30.4603
32.76	290.154	36.0982
34.26	292.289	43.2837
35.76	285.145	47.1173
37.26	267.862	44.0461
38.76	296.45	35.3408
40.26	618.51	210.994
41.76	265.747	40.7735
43.26	258.675	44.7853
44.76	251.595	39.0336
46.26	245.937	31.5328
47.76	235.484	26.6732
49.26	225.14	26.1463
50.76	222.617	29.0239
52.26	307.444	41.6729
53.76	232.356	39.7581
55.26	267.133	45.3686
56.76	232.003	39.4068
58.26	225.171	37.1566
59.76	235.041	39.1632
60.36	237.977	40.0112
61.26	238.508	43.8106
62.76	227.02	44.1317
64.26	301.13	88.2066
65.76	251.83	63.2595
67.26	238.092	55.8245
68.76	215.721	51.7301
70.26	199.293	43.4777
71.76	196.332	43.5875
73.26	202.542	41.6555
74.76	210.833	44.3398
76.26	217.506	46.8048
77.76	201.631	41.2439
79.26	208.582	39.17
80.76	202.189	35.353
82.26	201.809	32.4974
83.76	233.375	42.7147
85.26	235.82	45.6532
86.76	227.858	37.4702
88.26	213.715	35.0423
88.5	211.096	34.6842
89.76	208.847	41.1228
91.26	215.313	43.223
92.76	206.617	38.2535
94.26	203.66	31.0629
95.76	331.33	77.2633
97.26	200.528	28.9132
98.76	221.888	36.3954
100.26	212.072	39.4927
101.76	214.92	33.0287
103.26	201.419	32.3085
104.76	297.801	78.1048
106.26	210.371	48.4488
107.76	192.161	43.8864
107.94	193.002	44.8443
109.26	210.992	53.5586
110.76	230.064	58.8302
112.26	224.316	59.1597
113.76	206.371	50.2242
115.26	190.883	35.8979
116.76	196.626	35.0729
118.26	204.64	39.238
119.76	230.766	45.2209
121.26	423.714	109.614
122.76	255.754	61.7577
124.26	374.306	112.699
125.76	258.522	56.3963
127.26	247.709	51.2237
128.76	257.194	58.5754
130.26	310.503	56.8913
131.76	275.655	62.6646
133.26	267.689	65.4978
134.76	264.375	60.7277
136.26	260.893	56.1393
137.76	258.265	52.1928
139.26	288.727	69.5115
140.76	231.776	48.2185
142.26	243.038	46.7799
143.76	258.594	44.5198
145.26	255.147	36.6847
146.76	260.341	33.6275
148.26	268.544	43.4265
149.76	344.684	86.0415
151.26	264.678	47.2487
152.76	245.489	43.1865
154.26	252.563	46.391
155.76	277.383	47.7815
157.26	583.262	157.318
158.76	300.334	60.162
160.26	268.144	42.7334
161.76	267.031	44.0362
163.26	272.115	45.2203
164.76	253.473	42.4504
166.26	263.578	45.7596
167.76	279.434	48.4344
169.26	284.055	47.7068
170.76	303.404	54.0647
172.26	304.501	62.1831
173.76	288.819	51.4324
175.26	295.783	54.7442
176.76	287.326	49.9491
178.26	284.527	54.447
179.76	259.545	47.4474
181.26	253.694	51.1713
182.76	248.994	55.1941
184.26	240.556	57.4396
185.76	271.247	63.9435
187.26	263.666	46.9696
188.76	247.965	40.3504
190.26	251.202	38.0807
191.76	241.561	34.3349
193.26	273.641	33.9302
194.76	252.799	41.0034
196.26	430.817	91.5219
197.76	250.771	41.7675
199.26	253.577	39.9852
200.76	250.331	32.7534
202.26	248.681	37.2726
203.76	260.476	45.838
205.26	292.905	50.6658
206.76	301.986	60.7687
208.26	295.675	59.3021
209.76	278.698	50.9373
211.26	278.782	53.8537
212.76	277.551	50.4355
214.26	299.042	51.3114
215.76	318.664	47.5708
217.26	368.884	57.0437
218.76	331.273	58.7062
220.26	335.477	59.4986
221.76	338.603	62.3786
223.26	411.194	92.5973
224.76	333.639	71.2874
226.26	453.535	85.9249
227.76	299.65	61.6892
229.26	317.971	67.1419
230.76	326.845	64.0669
232.26	359.385	76.7588
233.76	342.148	75.167
234.21	360.51	83.1115
235.26	347.862	75.5707
236.76	350.875	82.5208
238.26	336.702	79.6748
239.76	344.779	85.2076
241.26	367.202	78.0041
242.76	383.232	79.9698
244.26	389.967	85.4894
245.76	402.188	96.9134
247.26	377.924	83.6764
248.76	387.728	77.7766
250.26	401.533	84.7086
251.76	391.74	81.2319
253.26	369.861	78.5482
254.76	362.706	80.4109
256.26	370.655	72.9383
257.76	415.235	84.256
259.26	451.889	96.4839
260.76	457.74	91.1474
262.26	446.014	84.9604
263.76	438.845	84.6261
265.26	451.772	84.5884
266.76	467.787	87.0206
268.26	463.243	93.8496
269.76	495.498	106.038
271.26	497.628	102.528
272.76	505.116	108.594
274.26	506.539	108.419
275.76	510.618	103.075
277.26	534.568	105.094
278.76	569.485	111.384
280.26	650.143	138.118
281.76	576.526	102.587
283.26	636.61	110.621
284.76	687.818	135.884
286.26	664.744	116.52
287.76	685.197	115.023
289.26	700.442	107.645
290.76	728.617	122.769
292.26	793.933	130.768
293.76	778.107	138.336
295.26	789.466	132.308
296.76	811.147	112.418
298.26	938.707	121.36
299.76	953.84	110.644
301.26	1025.75	106.397
302.76	1335.92	109.451
304.26	1224.66	105.454
305.76	1838.01	95.5006
307.26	1527.67	152.692
308.76	1487.17	111.935
310.26	1737.81	108.335
311.76	1723.88	125.088
313.26	1817.59	131.704
314.76	1885.38	116.634
316.26	2003.41	113.771
317.76	2184.03	98.6259
319.26	2559.51	92.1177
320.76	3455.79	177.781
322.26	3564.97	132.153
323.76	3722.1	153.309
325.26	4361.21	143.62
326.76	4362	142.805
328.26	5382.56	121.704
329.76	6266.28	178.486
331.26	7962.31	305.552
332.76	9452.98	193.629
334.26	12615	107.623
335.76	17462.2	116.999
