# Supplementary material for: Study on the Interaction between Soil and the Five-Claw Combination of a Mole Using the Discrete Element Method
Source: Appl Bionics Biomech. 2018 Aug 6;2018:7854052. doi: 10.1155/2018/7854052 (PMC6109513; doi:10.1155/2018/7854052)
Supplement: Supplementary 2 — Table S2: calibration of the model soil particles. The soil rupture distance ratio (m) of a blade with the values predicted by the analytical method from Hettiaratchi et al. [9]. The corresponding values of the soil rupture distance ratio (m) obtained from the simulation. [file 7854052.f2.xlsx]

## Sheet: Prediction of m
The soil rupture distance ratio (m) predicted by Hettiaratchi (1966)
Calculation:
The soil rupture distance ratio (m) was predicted by Hettiaratchi (1966) in Equation (1):
Where mδ is the required soil rupture distance ratio; δ is the angle of soil-tool friction and φ is the angle of soil internal friction;
mδ=φ and mδ=0 are respectively the corresponding values of m at δ=φ and δ=0 which could reference the graphs by Hettiaratchi (1966).
For any given rake angle α, the variation of m with φ can be expressed with considerable accuracy in Equation (2):
where a and b are constants dependent on α. For small values of φ (rad), tanφ=φ (the error of such an approximation being about 0.2% for φ=±5°).
In our paper, δ = 29.68° and φ = 26.57°.
According to the Equation (2) and corresponding values of m at δ=φ and δ=0 which could reference the graphs by Hettiaratchi (1966), the values of m with φ are calculated below.
Rake angle (α)	δ = 0			δ = φ
	m (φ=25°)	m (φ=30°)	m (φ=26.57°)	m (φ=25°)	m (φ=30°)	m (φ=26.57°)
30°	3.4	3.65	3.4766	3.38	3.65	3.46256							Mean ratio of soil rupture distance to depth when δ = 0 by Hettiaratchi (1966)
50°	2.5	2.7	2.56115	2.7	2.9	2.76127
70°	1.9	2.2	1.98951	2.5	2.75	2.57595
90°	1.75	1.9	1.79578	2.7	3.1	2.8197
According to the Equation (1) and corresponding values of m at δ=φ and δ=0 , the values of m with δ are calculated below.
Rake angle (α)	φ=26.57°
	m (δ = 0)	m (δ = φ)	m (δ = 29.68°)
30°	3.4766	3.46256	3.46092
50°	2.56115	2.76127	2.78569
70°	1.98951	2.57595	2.65503
90°	1.79578	2.8197	2.97262
Therefore, the required soil rupture distance ratio (m) of δ = 29.68° and φ = 26.57° in our paper is predicted according to Hettiaratchi (1966) in the following table.
Rake angle (α)	m
30°	3.46092
50°	2.78569
70°	2.65503
90°	2.97262												Mean ratio of soil rupture distance to depth when δ=φ by Hettiaratchi (1966)

## Sheet: Simulation of m
The soil rupture distance ratio (m) simulated by DEM
Rake angle (α)	Working depth (d)	The soil rupture distance (f) at 1.532s	m = f/d
30°	45mm	147.27mm	3.27267
50°	45mm	117.02mm	2.60044
70°	45mm	92.04mm	2.04533
90°	45mm	88.98mm	1.97733
