# Supplementary material for: Study on the Interaction between Soil and the Five-Claw Combination of a Mole Using the Discrete Element Method
Source: Appl Bionics Biomech. 2018 Aug 6;2018:7854052. doi: 10.1155/2018/7854052 (PMC6109513; doi:10.1155/2018/7854052)
Supplement: Supplementary 3 — Table S3: the draught and vertical forces affected by rake angles. The draught and vertical forces recorded along the travelling distance of the five-claw combination during the interaction with soil at the rake angles from 10° to 90° at 20° intervals and working speed of 3 m/s. [file 7854052.f3.xlsx]

## Sheet: The draught forces 
Rake angle = 10°				Rake angle = 30°				Rake angle = 50°				Rake angle = 70°				Rake angle = 90°
Time (s)	Distance (m)	Draught forces (N)		Time (s)	Distance (m)	Draught forces (N)		Time (s)	Distance (m)	Draught forces (N)		Time (s)	Distance (m)	Draught forces (N)		Time (s)	Distance (m)	Draught forces (N)
0	0	0		0	0	0		0	0	0		0	0	0		0	0	0
0.00042	0.00126	0		0.00042	0.00126	0		0.00042	0.00126	0		0.00042	0.00126	0		0.00042	0.00126	0
0.00092	0.00276	0		0.00092	0.00276	0		0.00092	0.00276	0		0.00092	0.00276	0		0.00044	0.00132	0
0.00142	0.00426	0		0.00142	0.00426	0		0.00142	0.00426	0		0.00142	0.00426	0		0.00092	0.00276	0
0.00192	0.00576	0		0.00192	0.00576	0		0.00192	0.00576	0		0.00192	0.00576	0		0.00142	0.00426	0
0.00242	0.00726	0		0.00242	0.00726	0		0.00242	0.00726	0		0.00242	0.00726	0		0.00192	0.00576	0
0.00292	0.00876	0		0.00292	0.00876	0		0.00292	0.00876	0		0.00292	0.00876	0		0.0021	0.0063	0
0.00342	0.01026	0		0.00342	0.01026	0		0.00342	0.01026	0		0.00342	0.01026	0		0.00242	0.00726	0
0.00392	0.01176	0		0.00392	0.01176	0		0.00392	0.01176	0		0.00392	0.01176	0		0.00292	0.00876	0
0.00442	0.01326	0		0.00442	0.01326	0		0.00442	0.01326	0		0.00442	0.01326	0		0.00342	0.01026	0
0.00492	0.01476	0		0.00492	0.01476	0		0.00492	0.01476	0		0.00465	0.01395	0		0.00392	0.01176	6.34671
0.00542	0.01626	0		0.00542	0.01626	0		0.00542	0.01626	0		0.00492	0.01476	0		0.00442	0.01326	189.586
0.00592	0.01776	0		0.00592	0.01776	0		0.00592	0.01776	0		0.00542	0.01626	0		0.00492	0.01476	307.029
0.00642	0.01926	0		0.00642	0.01926	0		0.00642	0.01926	0		0.00592	0.01776	191.278		0.00542	0.01626	136.844
0.00692	0.02076	0		0.00692	0.02076	0		0.00692	0.02076	0		0.00619	0.01857	0		0.00592	0.01776	309.289
0.00742	0.02226	0		0.00742	0.02226	0		0.00742	0.02226	0		0.00642	0.01926	0		0.00642	0.01926	278.919
0.00792	0.02376	0		0.00792	0.02376	0		0.00792	0.02376	0		0.00692	0.02076	469.468		0.00692	0.02076	241.245
0.00842	0.02526	0		0.00842	0.02526	0		0.00842	0.02526	39.1034		0.00742	0.02226	27.2608		0.00742	0.02226	309.525
0.00892	0.02676	292.491		0.00892	0.02676	0		0.00892	0.02676	86.9949		0.00746	0.02238	38.2351		0.00792	0.02376	305.096
0.00942	0.02826	0		0.00942	0.02826	0		0.00942	0.02826	28.4518		0.00788	0.02364	181.797		0.00842	0.02526	264.568
0.00992	0.02976	0		0.00992	0.02976	38.0387		0.00992	0.02976	181.179		0.00802	0.02406	116.305		0.00892	0.02676	260.017
0.01042	0.03126	0		0.01042	0.03126	18.0381		0.01042	0.03126	15.9683		0.00812	0.02436	113.578		0.00942	0.02826	245.398
0.01092	0.03276	0		0.01092	0.03276	16.3429		0.01092	0.03276	105.172		0.00822	0.02466	137.112		0.00992	0.02976	380.697
0.01142	0.03426	25.0296		0.01142	0.03426	196.974		0.01142	0.03426	88.1967		0.00832	0.02496	193.738		0.01042	0.03126	278.62
0.01192	0.03576	15.0891		0.01192	0.03576	62.99		0.01192	0.03576	152.564		0.00842	0.02526	700.579		0.01092	0.03276	290.154
0.01242	0.03726	13.578		0.01242	0.03726	61.3549		0.01242	0.03726	121.052		0.00852	0.02556	195.257		0.01142	0.03426	292.289
0.01292	0.03876	10.6098		0.01292	0.03876	360.712		0.01292	0.03876	176.561		0.00862	0.02586	71.2498		0.01192	0.03576	285.145
0.01342	0.04026	9.66509		0.01342	0.04026	216.464		0.01342	0.04026	135.317		0.00872	0.02616	123.788		0.01242	0.03726	267.862
0.01392	0.04176	197.155		0.01392	0.04176	79.2773		0.01392	0.04176	132.352		0.00882	0.02646	138.637		0.01292	0.03876	296.45
0.01442	0.04326	318.236		0.01442	0.04326	92.6483		0.01442	0.04326	164.175		0.00892	0.02676	138.351		0.01342	0.04026	618.51
0.01492	0.04476	75.4611		0.01492	0.04476	62.2055		0.01492	0.04476	126.733		0.00902	0.02706	90.9551		0.01392	0.04176	265.747
0.01542	0.04626	93.1283		0.01542	0.04626	95.119		0.01542	0.04626	438.105		0.00912	0.02736	106.232		0.01442	0.04326	258.675
0.01592	0.04776	89.8165		0.01592	0.04776	84.1902		0.01592	0.04776	125.782		0.00922	0.02766	217.279		0.01492	0.04476	251.595
0.01642	0.04926	99.2043		0.01642	0.04926	383.605		0.01642	0.04926	166.58		0.00932	0.02796	164.29		0.01542	0.04626	245.937
0.01692	0.05076	99.6283		0.01692	0.05076	117.748		0.01692	0.05076	180.41		0.00942	0.02826	387.915		0.01592	0.04776	235.484
0.01742	0.05226	209.954		0.01742	0.05226	161.8		0.01742	0.05226	169.169		0.00952	0.02856	149.928		0.01642	0.04926	225.14
0.01792	0.05376	110.769		0.01792	0.05376	139.279		0.01792	0.05376	199.498		0.00962	0.02886	500.056		0.01692	0.05076	222.617
0.01842	0.05526	134.341		0.01842	0.05526	142.124		0.01842	0.05526	270.597		0.00972	0.02916	140.083		0.01742	0.05226	307.444
0.01892	0.05676	125.299		0.01892	0.05676	155.656		0.01892	0.05676	190.782		0.00982	0.02946	143.143		0.01792	0.05376	232.356
0.01942	0.05826	145.825		0.01942	0.05826	258.131		0.01942	0.05826	178.743		0.00992	0.02976	455.871		0.01842	0.05526	267.133
0.01992	0.05976	194.905		0.01992	0.05976	124.654		0.01992	0.05976	205.028		0.01002	0.03006	214.712		0.01892	0.05676	232.003
0.02042	0.06126	187.565		0.02042	0.06126	178.061		0.02042	0.06126	365.985		0.01012	0.03036	182.602		0.01942	0.05826	225.171
0.02092	0.06276	169.551		0.02092	0.06276	181.511		0.02092	0.06276	149.445		0.01022	0.03066	188.078		0.01992	0.05976	235.041
0.02142	0.06426	139.157		0.02142	0.06426	187.395		0.02142	0.06426	178.112		0.01032	0.03096	184.042		0.02012	0.06036	237.977
0.02192	0.06576	142.756		0.02192	0.06576	198.983		0.02192	0.06576	178.834		0.01042	0.03126	185.933		0.02042	0.06126	238.508
0.02242	0.06726	173.91		0.02242	0.06726	190.855		0.02242	0.06726	439.498		0.01052	0.03156	394.7		0.02092	0.06276	227.02
0.02292	0.06876	234.759		0.02292	0.06876	192.027		0.02292	0.06876	155.105		0.01062	0.03186	220.669		0.02142	0.06426	301.13
0.02342	0.07026	189.027		0.02342	0.07026	234.505		0.02342	0.07026	126.651		0.01072	0.03216	247.51		0.02192	0.06576	251.83
0.02392	0.07176	189.366		0.02392	0.07176	206.018		0.02392	0.07176	190.212		0.01082	0.03246	195.894		0.02242	0.06726	238.092
0.02442	0.07326	208.474		0.02442	0.07326	228.432		0.02442	0.07326	201.88		0.01092	0.03276	201.753		0.02292	0.06876	215.721
0.02492	0.07476	162.44		0.02492	0.07476	199.491		0.02492	0.07476	142.544		0.01102	0.03306	311.701		0.02342	0.07026	199.293
0.02542	0.07626	207.845		0.02542	0.07626	191.212						0.01112	0.03336	227.633		0.02392	0.07176	196.332
0.02592	0.07776	190.618		0.02592	0.07776	201.359						0.01122	0.03366	213.918		0.02442	0.07326	202.542
0.02642	0.07926	202.88		0.02642	0.07926	181.995						0.01132	0.03396	232.605		0.02492	0.07476	210.833
0.02692	0.08076	177.855		0.02692	0.08076	170.577						0.01142	0.03426	250.961		0.02542	0.07626	217.506
0.02742	0.08226	189.932		0.02742	0.08226	174.503						0.01152	0.03456	324.644		0.02592	0.07776	201.631
0.02792	0.08376	560.561		0.02792	0.08376	372.738						0.01162	0.03486	213.231		0.02642	0.07926	208.582
0.02842	0.08526	229.08		0.02842	0.08526	179.697						0.01172	0.03516	219.433		0.02692	0.08076	202.189
0.02892	0.08676	248.605		0.02892	0.08676	231.938						0.01182	0.03546	219.897		0.02742	0.08226	201.809
0.02942	0.08826	278.611		0.02942	0.08826	205.254						0.01192	0.03576	396.625		0.02792	0.08376	233.375
0.02992	0.08976	309.661		0.02992	0.08976	205.062						0.01202	0.03606	209.101		0.02842	0.08526	235.82
0.03042	0.09126	295.26		0.03042	0.09126	197.785						0.01212	0.03636	308.84		0.02892	0.08676	227.858
0.03092	0.09276	266.683		0.03092	0.09276	174.564						0.01222	0.03666	249.521		0.02942	0.08826	213.715
				0.03142	0.09426	179.012						0.01232	0.03696	196.553		0.0295	0.0885	211.096
				0.03192	0.09576	162.317						0.01242	0.03726	199.625		0.02992	0.08976	208.847
				0.03242	0.09726	144.633						0.01252	0.03756	319.303		0.03042	0.09126	215.313
				0.03292	0.09876	136.199						0.01262	0.03786	266.869		0.03092	0.09276	206.617
				0.03342	0.10026	117.154						0.01272	0.03816	364.399		0.03142	0.09426	203.66
				0.03392	0.10176	113.77						0.01282	0.03846	361.232		0.03192	0.09576	331.33
				0.03442	0.10326	235.156						0.01292	0.03876	193.883		0.03242	0.09726	200.528
				0.03492	0.10476	157.377						0.01302	0.03906	196.129		0.03292	0.09876	221.888
				0.03542	0.10626	161.266						0.01312	0.03936	282.673		0.03342	0.10026	212.072
				0.03592	0.10776	177.412						0.01322	0.03966	218.755		0.03392	0.10176	214.92
				0.03642	0.10926	147.903						0.01332	0.03996	229.756		0.03442	0.10326	201.419
				0.03692	0.11076	153.707						0.01342	0.04026	282.25		0.03492	0.10476	297.801
				0.03742	0.11226	153.964						0.01352	0.04056	291.654		0.03542	0.10626	210.371
				0.03792	0.11376	124.38						0.01362	0.04086	222.69		0.03592	0.10776	192.161
				0.03842	0.11526	142.725						0.01372	0.04116	232.904		0.03598	0.10794	193.002
				0.03892	0.11676	235.101						0.01382	0.04146	220.646		0.03642	0.10926	210.992
				0.03942	0.11826	158.461						0.01392	0.04176	219.734		0.03692	0.11076	230.064
				0.03992	0.11976	162.002						0.01402	0.04206	219.588		0.03742	0.11226	224.316
				0.04042	0.12126	161.113						0.01412	0.04236	402.807		0.03792	0.11376	206.371
				0.04092	0.12276	150.359						0.01422	0.04266	215.974		0.03842	0.11526	190.883
				0.04142	0.12426	136.419						0.01432	0.04296	212.234		0.03892	0.11676	196.626
				0.04192	0.12576	144.969						0.01442	0.04326	230.916		0.03942	0.11826	204.64
				0.04242	0.12726	152.909						0.01452	0.04356	206.196		0.03992	0.11976	230.766
				0.04292	0.12876	152.151						0.01462	0.04386	214.501		0.04042	0.12126	423.714
				0.04342	0.13026	205.715						0.01472	0.04416	200.135		0.04092	0.12276	255.754
				0.04392	0.13176	154.159						0.01482	0.04446	196.689		0.04142	0.12426	374.306
				0.04442	0.13326	197.424						0.01492	0.04476	212.868		0.04192	0.12576	258.522
				0.04492	0.13476	157.393						0.01502	0.04506	198.243		0.04242	0.12726	247.709
				0.04542	0.13626	159.424						0.01512	0.04536	195.413		0.04292	0.12876	257.194
				0.04592	0.13776	191.391						0.01522	0.04566	192.649		0.04342	0.13026	310.503
												0.01532	0.04596	187.072		0.04392	0.13176	275.655
												0.01542	0.04626	185.259		0.04442	0.13326	267.689
												0.01552	0.04656	184.3		0.04492	0.13476	264.375
												0.01562	0.04686	184.623		0.04542	0.13626	260.893
												0.01572	0.04716	185.359		0.04592	0.13776	258.265
												0.01582	0.04746	186.742		0.04642	0.13926	288.727
												0.01592	0.04776	186.465		0.04692	0.14076	231.776
																0.04742	0.14226	243.038
																0.04792	0.14376	258.594
																0.04842	0.14526	255.147
																0.04892	0.14676	260.341
																0.04942	0.14826	268.544
																0.04992	0.14976	344.684
																0.05042	0.15126	264.678
																0.05092	0.15276	245.489
																0.05142	0.15426	252.563
																0.05192	0.15576	277.383
																0.05242	0.15726	583.262
																0.05292	0.15876	300.334
																0.05342	0.16026	268.144
																0.05392	0.16176	267.031
																0.05442	0.16326	272.115
																0.05492	0.16476	253.473
																0.05542	0.16626	263.578
																0.05592	0.16776	279.434
																0.05642	0.16926	284.055

## Sheet: The vertical forces
Rake angle = 10°				Rake angle = 30°				Rake angle = 50°				Rake angle = 70°				Rake angle = 90°
Time (s)	Distance (mm)	Vertical forces (N)		Time (s)	Distance (mm)	Vertical forces (N)		Time (s)	Distance (mm)	Vertical forces (N)		Time (s)	Distance (mm)	Vertical forces (N)		Time (s)	Distance (mm)	Vertical forces (N)
0	4.47624	0		0	4.47624	0		0	4.47624	0		0	0	0		0	0	0
0.00042	4.4775	0		0.00042	4.4775	0		0.00042	4.4775	0		0.00042	0.00126	0		0.00042	0.00126	0
0.00092	4.479	0		0.00092	4.479	0		0.00092	4.479	0		0.00092	0.00276	0		0.00044	0.00132	0
0.00142	4.4805	0		0.00142	4.4805	0		0.00142	4.4805	0		0.00142	0.00426	0		0.00092	0.00276	0
0.00192	4.482	0		0.00192	4.482	0		0.00192	4.482	0		0.00192	0.00576	0		0.00142	0.00426	0
0.00242	4.4835	0		0.00242	4.4835	0		0.00242	4.4835	0		0.00242	0.00726	0		0.00192	0.00576	0
0.00292	4.485	0		0.00292	4.485	0		0.00292	4.485	0		0.00292	0.00876	0		0.0021	0.0063	0
0.00342	4.4865	0		0.00342	4.4865	0		0.00342	4.4865	0		0.00342	0.01026	0		0.00242	0.00726	0
0.00392	4.488	0		0.00392	4.488	0		0.00392	4.488	0		0.00392	0.01176	0		0.00292	0.00876	0
0.00442	4.4895	0		0.00442	4.4895	0		0.00442	4.4895	0		0.00442	0.01326	0		0.00342	0.01026	0
0.00492	4.491	0		0.00492	4.491	0		0.00492	4.491	0		0.00465	0.01395	0		0.00392	0.01176	1.36117
0.00542	4.4925	0		0.00542	4.4925	0		0.00542	4.4925	0		0.00492	0.01476	0		0.00442	0.01326	-15.6052
0.00592	4.494	0		0.00592	4.494	0		0.00592	4.494	0		0.00542	0.01626	0		0.00492	0.01476	41.4007
0.00642	4.4955	0		0.00642	4.4955	0		0.00642	4.4955	0		0.00592	0.01776	0		0.00542	0.01626	13.0365
0.00692	4.497	0		0.00692	4.497	0		0.00692	4.497	0		0.00619	0.01857	0		0.00592	0.01776	17.3401
0.00742	4.4985	0		0.00742	4.4985	0		0.00742	4.4985	0		0.00642	0.01926	0		0.00642	0.01926	18.9651
0.00792	4.5	0		0.00792	4.5	0		0.00792	4.5	0		0.00692	0.02076	-140.502		0.00692	0.02076	17.3654
0.00842	4.5015	0		0.00842	4.5015	0		0.00842	4.5015	18.1217		0.00742	0.02226	1.16646		0.00742	0.02226	49.043
0.00892	4.503	0		0.00892	4.503	0		0.00892	4.503	15.4973		0.00746	0.02238	4.4586		0.00792	0.02376	28.6349
0.00942	4.5045	0		0.00942	4.5045	0		0.00942	4.5045	0.211006		0.00788	0.02364	14.0408		0.00842	0.02526	24.4459
0.00992	4.506	0		0.00992	4.506	2.36639		0.00992	4.506	80.271		0.00802	0.02406	6.76988		0.00892	0.02676	30.8262
0.01042	4.5075	0		0.01042	4.5075	4.17224		0.01042	4.5075	-6.43213		0.00812	0.02436	-22.308		0.00942	0.02826	28.2202
0.01092	4.509	0		0.01092	4.509	4.17387		0.01092	4.509	-5.67087		0.00822	0.02466	18.9659		0.00992	0.02976	91.5879
0.01142	4.5105	6.62105		0.01142	4.5105	20.3787		0.01142	4.5105	-3.35836		0.00832	0.02496	-63.6002		0.01042	0.03126	30.4603
0.01192	4.512	-2.25371		0.01192	4.512	-2.16183		0.01192	4.512	-17.8179		0.00842	0.02526	-134.044		0.01092	0.03276	36.0982
0.01242	4.5135	3.22539		0.01242	4.5135	-1.47466		0.01242	4.5135	-6.34621		0.00852	0.02556	4.59707		0.01142	0.03426	43.2837
0.01292	4.515	3.46869		0.01292	4.515	34.8794		0.01292	4.515	-16.949		0.00862	0.02586	-5.23042		0.01192	0.03576	47.1173
0.01342	4.5165	2.9582		0.01342	4.5165	11.491		0.01342	4.5165	-20.0686		0.00872	0.02616	-1.93768		0.01242	0.03726	44.0461
0.01392	4.518	42.4408		0.01392	4.518	-7.92724		0.01392	4.518	-10.7872		0.00882	0.02646	-5.21602		0.01292	0.03876	35.3408
0.01442	4.5195	-49.5314		0.01442	4.5195	1.83072		0.01442	4.5195	-18.7445		0.00892	0.02676	-6.98892		0.01342	0.04026	210.994
0.01492	4.521	20.3748		0.01492	4.521	-2.88009		0.01492	4.521	-14.4984		0.00902	0.02706	-4.07933		0.01392	0.04176	40.7735
0.01542	4.5225	15.8289		0.01542	4.5225	7.24514		0.01542	4.5225	-88.8953		0.00912	0.02736	-2.8274		0.01442	0.04326	44.7853
0.01592	4.524	12.6369		0.01592	4.524	6.65216		0.01592	4.524	-8.21475		0.00922	0.02766	-14.0923		0.01492	0.04476	39.0336
0.01642	4.5255	10.3624		0.01642	4.5255	-105.672		0.01642	4.5255	-2.02119		0.00932	0.02796	15.1606		0.01542	0.04626	31.5328
0.01692	4.527	4.25304		0.01692	4.527	-13.1758		0.01692	4.527	-7.95063		0.00942	0.02826	-75.0388		0.01592	0.04776	26.6732
0.01742	4.5285	28.8159		0.01742	4.5285	-8.19262		0.01742	4.5285	-5.10469		0.00952	0.02856	-11.0401		0.01642	0.04926	26.1463
0.01792	4.53	5.69265		0.01792	4.53	-22.2415		0.01792	4.53	-12.0584		0.00962	0.02886	33.1768		0.01692	0.05076	29.0239
0.01842	4.5315	19.8268		0.01842	4.5315	-13.189		0.01842	4.5315	25.7218		0.00972	0.02916	1.16881		0.01742	0.05226	41.6729
0.01892	4.533	3.54005		0.01892	4.533	-29.8057		0.01892	4.533	-9.30492		0.00982	0.02946	-2.30175		0.01792	0.05376	39.7581
0.01942	4.5345	10.3396		0.01942	4.5345	-78.7081		0.01942	4.5345	-11.767		0.00992	0.02976	-14.0527		0.01842	0.05526	45.3686
0.01992	4.536	26.5138		0.01992	4.536	-12.7918		0.01992	4.536	11.6955		0.01002	0.03006	9.16202		0.01892	0.05676	39.4068
0.02042	4.5375	13.7756		0.02042	4.5375	-24.2932		0.02042	4.5375	-85.1893		0.01012	0.03036	13.2524		0.01942	0.05826	37.1566
0.02092	4.539	51.4836		0.02092	4.539	-26.5085		0.02092	4.539	-3.15761		0.01022	0.03066	19.2468		0.01992	0.05976	39.1632
0.02142	4.5405	23.8629		0.02142	4.5405	-29.4966		0.02142	4.5405	-17.6627		0.01032	0.03096	14.0846		0.02012	0.06036	40.0112
0.02192	4.542	15.2785		0.02192	4.542	-7.79771		0.02192	4.542	-14.0207		0.01042	0.03126	11.0815		0.02042	0.06126	43.8106
0.02242	4.5435	34.703		0.02242	4.5435	-20.2205		0.02242	4.5435	-31.3799		0.01052	0.03156	18.2611		0.02092	0.06276	44.1317
0.02292	4.545	-20.1842		0.02292	4.545	-24.0113		0.02292	4.545	-11.5927		0.01062	0.03186	9.2362		0.02142	0.06426	88.2066
0.02342	4.5465	43.9686		0.02342	4.5465	-6.47901		0.02342	4.5465	-4.34005		0.01072	0.03216	36.9203		0.02192	0.06576	63.2595
0.02392	4.548	44.3393		0.02392	4.548	-11.7882		0.02392	4.548	9.54273		0.01082	0.03246	11.7501		0.02242	0.06726	55.8245
0.02442	4.5495	44.9118		0.02442	4.5495	-27.0672		0.02442	4.5495	-4.08476		0.01092	0.03276	8.08231		0.02292	0.06876	51.7301
0.02492	4.551	57.075		0.02492	4.551	-5.61336		0.02492	4.551	-7.54032		0.01102	0.03306	51.9469		0.02342	0.07026	43.4777
0.02542	4.5525	43.9499		0.02542	4.5525	1.09615						0.01112	0.03336	16.9857		0.02392	0.07176	43.5875
0.02592	4.554	32.0257		0.02592	4.554	-1.9618						0.01122	0.03366	22.162		0.02442	0.07326	41.6555
0.02642	4.5555	27.0461		0.02642	4.5555	2.92098						0.01132	0.03396	23.6372		0.02492	0.07476	44.3398
0.02692	4.557	47.3148		0.02692	4.557	7.76502						0.01142	0.03426	28.1082		0.02542	0.07626	46.8048
0.02742	4.5585	52.6372		0.02742	4.5585	-1.62683						0.01152	0.03456	27.7979		0.02592	0.07776	41.2439
0.02792	4.56	75.6798		0.02792	4.56	0.725551						0.01162	0.03486	11.9078		0.02642	0.07926	39.17
0.02842	4.5615	29.5067		0.02842	4.5615	-11.7326						0.01172	0.03516	16.5899		0.02692	0.08076	35.353
0.02892	4.563	57.6715		0.02892	4.563	23.2475						0.01182	0.03546	20.1445		0.02742	0.08226	32.4974
0.02942	4.5645	63.478		0.02942	4.5645	4.39289						0.01192	0.03576	70.8564		0.02792	0.08376	42.7147
0.02992	4.566	125.47		0.02992	4.566	6.9612						0.01202	0.03606	16.9756		0.02842	0.08526	45.6532
0.03042	4.5675	30.9941		0.03042	4.5675	7.33653						0.01212	0.03636	28.6771		0.02892	0.08676	37.4702
0.03092	4.569	65.5724		0.03092	4.569	4.78464						0.01222	0.03666	20.044		0.02942	0.08826	35.0423
				0.03142	4.5705	4.43994						0.01232	0.03696	16.0882		0.0295	0.0885	34.6842
				0.03192	4.572	2.87426						0.01242	0.03726	20.548		0.02992	0.08976	41.1228
				0.03242	4.5735	10.9895						0.01252	0.03756	84.4842		0.03042	0.09126	43.223
				0.03292	4.575	13.0502						0.01262	0.03786	-0.230861		0.03092	0.09276	38.2535
				0.03342	4.5765	19.0996						0.01272	0.03816	57.5966		0.03142	0.09426	31.0629
				0.03392	4.578	19.1961						0.01282	0.03846	94.9572		0.03192	0.09576	77.2633
				0.03442	4.5795	69.0331						0.01292	0.03876	18.2594		0.03242	0.09726	28.9132
				0.03492	4.581	-3.03341						0.01302	0.03906	18.1595		0.03292	0.09876	36.3954
				0.03542	4.5825	-8.4617						0.01312	0.03936	15.5842		0.03342	0.10026	39.4927
				0.03592	4.584	-7.62143						0.01322	0.03966	19.3572		0.03392	0.10176	33.0287
				0.03642	4.5855	-12.3525						0.01332	0.03996	20.2228		0.03442	0.10326	32.3085
				0.03692	4.587	-16.1014						0.01342	0.04026	48.8788		0.03492	0.10476	78.1048
				0.03742	4.5885	-11.1161						0.01352	0.04056	47.9755		0.03542	0.10626	48.4488
				0.03792	4.59	5.60848						0.01362	0.04086	18.3301		0.03592	0.10776	43.8864
				0.03842	4.5915	-0.0460015						0.01372	0.04116	16.8453		0.03598	0.10794	44.8443
				0.03892	4.593	-10.7813						0.01382	0.04146	17.3059		0.03642	0.10926	53.5586
				0.03942	4.5945	0.889897						0.01392	0.04176	18.3443		0.03692	0.11076	58.8302
				0.03992	4.596	4.44451						0.01402	0.04206	17.197		0.03742	0.11226	59.1597
				0.04042	4.5975	5.83714						0.01412	0.04236	107.84		0.03792	0.11376	50.2242
				0.04092	4.599	6.03415						0.01422	0.04266	17.569		0.03842	0.11526	35.8979
				0.04142	4.6005	3.81152						0.01432	0.04296	15.4675		0.03892	0.11676	35.0729
				0.04192	4.602	-8.53183						0.01442	0.04326	27.9706		0.03942	0.11826	39.238
				0.04242	4.6035	4.12012						0.01452	0.04356	13.6653		0.03992	0.11976	45.2209
				0.04292	4.605	4.81191						0.01462	0.04386	21.0719		0.04042	0.12126	109.614
				0.04342	4.6065	-40.5813						0.01472	0.04416	13.439		0.04092	0.12276	61.7577
				0.04392	4.608	9.6958						0.01482	0.04446	13.2796		0.04142	0.12426	112.699
				0.04442	4.6095	-8.32486						0.01492	0.04476	26.165		0.04192	0.12576	56.3963
				0.04492	4.611	10.9374						0.01502	0.04506	18.5473		0.04242	0.12726	51.2237
				0.04542	4.6125	0.930229						0.01512	0.04536	19.2947		0.04292	0.12876	58.5754
				0.04592	4.614	-34.5682						0.01522	0.04566	19.2359		0.04342	0.13026	56.8913
												0.01532	0.04596	16.3142		0.04392	0.13176	62.6646
												0.01542	0.04626	16.7981		0.04442	0.13326	65.4978
												0.01552	0.04656	17.2231		0.04492	0.13476	60.7277
												0.01562	0.04686	16.2953		0.04542	0.13626	56.1393
												0.01572	0.04716	15.7252		0.04592	0.13776	52.1928
												0.01582	0.04746	14.0782		0.04642	0.13926	69.5115
												0.01592	0.04776	13.2353		0.04692	0.14076	48.2185
																0.04742	0.14226	46.7799
																0.04792	0.14376	44.5198
																0.04842	0.14526	36.6847
																0.04892	0.14676	33.6275
																0.04942	0.14826	43.4265
																0.04992	0.14976	86.0415
																0.05042	0.15126	47.2487
																0.05092	0.15276	43.1865
																0.05142	0.15426	46.391
																0.05192	0.15576	47.7815
																0.05242	0.15726	157.318
																0.05292	0.15876	60.162
																0.05342	0.16026	42.7334
																0.05392	0.16176	44.0362
																0.05442	0.16326	45.2203
																0.05492	0.16476	42.4504
																0.05542	0.16626	45.7596
																0.05592	0.16776	48.4344
																0.05642	0.16926	47.7068
