# Supplementary material for: Study on the Interaction between Soil and the Five-Claw Combination of a Mole Using the Discrete Element Method
Source: Appl Bionics Biomech. 2018 Aug 6;2018:7854052. doi: 10.1155/2018/7854052 (PMC6109513; doi:10.1155/2018/7854052)
Supplement: Supplementary 4 — Table S4: the draught and vertical forces affected by speeds. The draught and vertical forces recorded along the travelling distance of the five-claw combination during the interaction with soil at the working speeds from 1 to 5 m/s at an interval of 1 m/s and rake angle of 90°. [file 7854052.f4.xlsx]

## Sheet: The draught forces
Speed = 1m/s				Speed = 2m/s				Speed = 3m/s					Speed = 4m/s					Speed = 5m/s
Time (s)	Distance (m)	Draught forces (N)		Time (s)	Distance (m)	Draught forces (N)		Time (s)	Distance (m)	Draught forces (N)			Time (s)	Distance (m)	Draught forces (N)			Time (s)	Distance (m)	Draught forces (N)
0	0	0		0	0	0		0	0	0			0	0	0			0	0	0
0.00092	0.00092	0		0.00092	0.00184	0		0.00042	0.00126	0			0.00092	0.00368	0			0.00042	0.0021	0
0.00192	0.00192	0		0.00192	0.00384	0		0.00044	0.00132	0			0.00192	0.00768	0			0.00092	0.0046	0
0.00292	0.00292	0		0.00292	0.00584	0		0.00092	0.00276	0			0.00292	0.01168	93.8198			0.00142	0.0071	0
0.00392	0.00392	0		0.00392	0.00784	0		0.00142	0.00426	0			0.00392	0.01568	139.1			0.00192	0.0096	0
0.00492	0.00492	0		0.00492	0.00984	0		0.00192	0.00576	0			0.00492	0.01968	496.997			0.00242	0.0121	0
0.00592	0.00592	0		0.00592	0.01184	9.9303		0.0021	0.0063	0			0.00592	0.02368	701.61			0.00292	0.0146	107.53
0.00692	0.00692	0		0.00692	0.01384	114.799		0.00242	0.00726	0			0.00692	0.02768	360.127			0.00342	0.0171	175.328
0.00792	0.00792	0		0.00792	0.01584	166.595		0.00292	0.00876	0			0.00792	0.03168	412.673			0.00392	0.0196	78.5499
0.00892	0.00892	0		0.00892	0.01784	168.449		0.00342	0.01026	0			0.00892	0.03568	367.616			0.00442	0.0221	855.421
0.00992	0.00992	132.051		0.00992	0.01984	197.478		0.00392	0.01176	6.34671			0.00992	0.03968	364.82			0.00492	0.0246	703.744
0.01092	0.01092	150.385		0.01092	0.02184	191.645		0.00442	0.01326	189.586			0.01092	0.04368	330.888			0.00542	0.0271	631.393
0.01192	0.01192	60.8052		0.01192	0.02384	163.812		0.00492	0.01476	307.029			0.01192	0.04768	340.926			0.00592	0.0296	478.827
0.01292	0.01292	62.4352		0.01292	0.02584	232.88		0.00542	0.01626	136.844			0.01292	0.05168	299.706			0.00642	0.0321	463.604
0.01392	0.01392	79.1363		0.01392	0.02784	179.688		0.00592	0.01776	309.289			0.01392	0.05568	329.12			0.00692	0.0346	439.385
0.01492	0.01492	87.4873		0.01492	0.02984	206.701		0.00642	0.01926	278.919			0.01492	0.05968	333.239			0.00742	0.0371	458.817
0.01592	0.01592	86.3793		0.01592	0.03184	195.272		0.00692	0.02076	241.245			0.01592	0.06368	323.098			0.00792	0.0396	689.84
0.01692	0.01692	81.9551		0.01692	0.03384	194.388		0.00742	0.02226	309.525			0.01692	0.06768	619.839			0.00842	0.0421	641.751
0.01792	0.01792	74.0981		0.01792	0.03584	184.789		0.00792	0.02376	305.096			0.01792	0.07168	295.697			0.00892	0.0446	476.703
0.01892	0.01892	79.3819		0.01892	0.03784	317.649		0.00842	0.02526	264.568			0.01892	0.07568	242.932			0.00942	0.0471	447.21
0.01992	0.01992	92.1977		0.01992	0.03984	216.682		0.00892	0.02676	260.017			0.01992	0.07968	239.038			0.00992	0.0496	455.635
0.02092	0.02092	90.4872		0.02092	0.04184	185.385		0.00942	0.02826	245.398			0.02092	0.08368	268.877			0.01042	0.0521	466.916
0.02192	0.02192	93.5932		0.02192	0.04384	372.44		0.00992	0.02976	380.697			0.02192	0.08768	271.992			0.01092	0.0546	385.286
0.02292	0.02292	125.714		0.02292	0.04584	169.674		0.01042	0.03126	278.62			0.02292	0.09168	257.031			0.01142	0.0571	376.945
0.02392	0.02392	112.92		0.02392	0.04784	173.602		0.01092	0.03276	290.154			0.02392	0.09568	342.946			0.01192	0.0596	382.637
0.02492	0.02492	104.55		0.02492	0.04984	145.542		0.01142	0.03426	292.289			0.02492	0.09968	318.654			0.01242	0.0621	398.444
0.02592	0.02592	97.9777		0.02592	0.05184	150.275		0.01192	0.03576	285.145			0.02592	0.10368	276.701			0.01292	0.0646	403.721
0.02692	0.02692	98.9275		0.02692	0.05384	151.214		0.01242	0.03726	267.862			0.02692	0.10768	292.058			0.01342	0.0671	376.686
0.02792	0.02792	148.115		0.02792	0.05584	152.479		0.01292	0.03876	296.45			0.02792	0.11168	302.345			0.01392	0.0696	383.845
0.02892	0.02892	104.86		0.02892	0.05784	169.883		0.01342	0.04026	618.51			0.02892	0.11568	319.581			0.01442	0.0721	374.466
0.02992	0.02992	117.766		0.02992	0.05984	179.176		0.01392	0.04176	265.747			0.02992	0.11968	621.015			0.01492	0.0746	365.117
0.03092	0.03092	110.608		0.03092	0.06184	201.34		0.01442	0.04326	258.675			0.03092	0.12368	330.58			0.01542	0.0771	340.337
0.03192	0.03192	113.9		0.03192	0.06384	193.938		0.01492	0.04476	251.595			0.03192	0.12768	352.037			0.01592	0.0796	313.681
0.03292	0.03292	115.172		0.03292	0.06584	184.852		0.01542	0.04626	245.937			0.03292	0.13168	364.495			0.01642	0.0821	333.14
0.03392	0.03392	108.376		0.03392	0.06784	190.669		0.01592	0.04776	235.484								0.01692	0.0846	344.475
0.03492	0.03492	107.654		0.03492	0.06984	175.432		0.01642	0.04926	225.14								0.01742	0.0871	485.179
0.03592	0.03592	106.832		0.03592	0.07184	159.96		0.01692	0.05076	222.617								0.01792	0.0896	370.337
0.03692	0.03692	103.784		0.03692	0.07384	149.224		0.01742	0.05226	307.444								0.01842	0.0921	386.555
0.03792	0.03792	99.2757		0.03792	0.07584	151.023		0.01792	0.05376	232.356								0.01892	0.0946	373.655
0.03892	0.03892	102.844		0.03892	0.07784	137.321		0.01842	0.05526	267.133								0.01942	0.0971	370.529
0.03992	0.03992	109.955		0.03992	0.07984	127.624		0.01892	0.05676	232.003								0.01992	0.0996	355.749
0.04092	0.04092	95.3596		0.04092	0.08184	119.166		0.01942	0.05826	225.171								0.02042	0.1021	468.685
0.04192	0.04192	87.4892		0.04192	0.08384	142.421		0.01992	0.05976	235.041								0.02092	0.1046	366.068
0.04292	0.04292	87.1751		0.04292	0.08584	143.181		0.02012	0.06036	237.977								0.02142	0.1071	454.483
0.04392	0.04392	86.944		0.04392	0.08784	163.754		0.02042	0.06126	238.508								0.02192	0.1096	427.1
0.04492	0.04492	84.8069		0.04492	0.08984	167.465		0.02092	0.06276	227.02								0.02242	0.1121	394.924
0.04592	0.04592	87.1116		0.04592	0.09184	165.344		0.02142	0.06426	301.13								0.02292	0.1146	431.09
0.04692	0.04692	103.737		0.04692	0.09384	173.956		0.02192	0.06576	251.83								0.02342	0.1171	442.785
0.04792	0.04792	106.142		0.04792	0.09584	172.648		0.02242	0.06726	238.092								0.02392	0.1196	435.958
0.04892	0.04892	108.118		0.04892	0.09784	169.929		0.02292	0.06876	215.721								0.02442	0.1221	413.562
0.04992	0.04992	111.157		0.04992	0.09984	147.67		0.02342	0.07026	199.293
0.05092	0.05092	109.268		0.05092	0.10184	153.654		0.02392	0.07176	196.332
0.05192	0.05192	104.244		0.05192	0.10384	145.906		0.02442	0.07326	202.542
0.05292	0.05292	105.087		0.05292	0.10584	152.295		0.02492	0.07476	210.833
0.05392	0.05392	100.065		0.05392	0.10784	143.045		0.02542	0.07626	217.506
0.05492	0.05492	98.604		0.05492	0.10984	163.23		0.02592	0.07776	201.631
0.05592	0.05592	99.5395		0.05592	0.11184	170.841		0.02642	0.07926	208.582
0.05692	0.05692	93.0754		0.05692	0.11384	205.92		0.02692	0.08076	202.189
0.05792	0.05792	95.1931		0.05792	0.11584	189.401		0.02742	0.08226	201.809
0.05892	0.05892	103.113		0.05892	0.11784	180.914		0.02792	0.08376	233.375
0.05992	0.05992	107.043		0.05992	0.11984	177.458		0.02842	0.08526	235.82
0.06092	0.06092	107.046		0.06092	0.12184	187.933		0.02892	0.08676	227.858
0.06192	0.06192	99.232		0.06192	0.12384	211.294		0.02942	0.08826	213.715
0.06292	0.06292	100.927		0.06292	0.12584	219.34		0.0295	0.0885	211.096
0.06392	0.06392	105.799		0.06392	0.12784	217.073		0.02992	0.08976	208.847
0.06492	0.06492	111.022		0.06492	0.12984	186.523		0.03042	0.09126	215.313
0.06592	0.06592	109.756		0.06592	0.13184	177.809		0.03092	0.09276	206.617
0.06692	0.06692	113.034		0.06692	0.13384	183.617		0.03142	0.09426	203.66
0.06792	0.06792	116.234		0.06792	0.13584	197.588		0.03192	0.09576	331.33
0.06892	0.06892	114.159		0.06892	0.13784	183.801		0.03242	0.09726	200.528
0.06992	0.06992	115.658		0.06992	0.13984	214.808		0.03292	0.09876	221.888
0.07092	0.07092	122.822		0.07092	0.14184	203.944		0.03342	0.10026	212.072
0.07192	0.07192	119.601		0.07192	0.14384	215.819		0.03392	0.10176	214.92
0.07292	0.07292	121.747		0.07292	0.14584	242.099		0.03442	0.10326	201.419
0.07392	0.07392	125.707		0.07392	0.14784	185.252		0.03492	0.10476	297.801
0.07492	0.07492	132.054		0.07492	0.14984	207.73		0.03542	0.10626	210.371
0.07592	0.07592	130.098		0.07592	0.15184	196.716		0.03592	0.10776	192.161
0.07692	0.07692	118.879		0.07692	0.15384	187.897		0.03598	0.10794	193.002
0.07792	0.07792	101.879		0.07792	0.15584	176.195		0.03642	0.10926	210.992
0.07892	0.07892	96.9154		0.07892	0.15784	192.056		0.03692	0.11076	230.064
0.07992	0.07992	84.1605		0.07992	0.15984	184.175		0.03742	0.11226	224.316
0.08092	0.08092	83.2447		0.08092	0.16184	175.787		0.03792	0.11376	206.371
0.08192	0.08192	90.6586		0.08192	0.16384	178.954		0.03842	0.11526	190.883
0.08292	0.08292	96.4006		0.08292	0.16584	181.994		0.03892	0.11676	196.626
0.08392	0.08392	109.434		0.08392	0.16784	173.588		0.03942	0.11826	204.64
0.08492	0.08492	117.079		0.08492	0.16984	179.657		0.03992	0.11976	230.766
0.08592	0.08592	117.057		0.08592	0.17184	160.257		0.04042	0.12126	423.714
0.08692	0.08692	110.163		0.08692	0.17384	160.635		0.04092	0.12276	255.754
0.08792	0.08792	95.798		0.08792	0.17584	336.396		0.04142	0.12426	374.306
0.08892	0.08892	91.5922		0.08892	0.17784	164.591		0.04192	0.12576	258.522
0.08992	0.08992	98.4929		0.08992	0.17984	188.754		0.04242	0.12726	247.709
0.09092	0.09092	105.831		0.09092	0.18184	217.051		0.04292	0.12876	257.194
0.09192	0.09192	112.359		0.09192	0.18384	191.506		0.04342	0.13026	310.503
0.09292	0.09292	112.638		0.09292	0.18584	171.29		0.04392	0.13176	275.655
0.09392	0.09392	106.908		0.09392	0.18784	204.034		0.04442	0.13326	267.689
0.09492	0.09492	110.335		0.09492	0.18984	199.799		0.04492	0.13476	264.375
0.09592	0.09592	118.944		0.09592	0.19184	201.058		0.04542	0.13626	260.893
0.09692	0.09692	126.05		0.09692	0.19384	223.494		0.04592	0.13776	258.265
0.09792	0.09792	131.842		0.09792	0.19584	198.084		0.04642	0.13926	288.727
0.09892	0.09892	131.446		0.09892	0.19784	210.069		0.04692	0.14076	231.776
0.09992	0.09992	125.38		0.09992	0.19984	223.493		0.04742	0.14226	243.038
0.10092	0.10092	112.596		0.10092	0.20184	225.613		0.04792	0.14376	258.594
0.10192	0.10192	111.779		0.10192	0.20384	228.59		0.04842	0.14526	255.147
0.10292	0.10292	107.553		0.10292	0.20584	228.573		0.04892	0.14676	260.341
0.10392	0.10392	110.671		0.10392	0.20784	226.955		0.04942	0.14826	268.544
0.10492	0.10492	111.815		0.10492	0.20984	237.149		0.04992	0.14976	344.684
0.10592	0.10592	109.198		0.10592	0.21184	222.334		0.05042	0.15126	264.678
0.10692	0.10692	109.433		0.10692	0.21384	230.428		0.05092	0.15276	245.489
0.10792	0.10792	174.098		0.10792	0.21584	205.604		0.05142	0.15426	252.563
0.10892	0.10892	124.369		0.10892	0.21784	226.653		0.05192	0.15576	277.383
0.10992	0.10992	130.702		0.10992	0.21984	204.442		0.05242	0.15726	583.262
0.11092	0.11092	128.212		0.11092	0.22184	225.055		0.05292	0.15876	300.334
0.11192	0.11192	124.004		0.11192	0.22384	293.848		0.05342	0.16026	268.144
0.11292	0.11292	135.402		0.11292	0.22584	251.018		0.05392	0.16176	267.031
								0.05442	0.16326	272.115
								0.05492	0.16476	253.473
								0.05542	0.16626	263.578
								0.05592	0.16776	279.434
								0.05642	0.16926	284.055

## Sheet: The vertical forces
Speed = 1m/s				Speed = 2m/s				Speed = 3m/s					Speed = 4m/s					Speed = 5m/s
Time (s)	Distance (m)	Vertical forces (N)		Time (s)	Distance (m)	Vertical forces (N)		Time (s)	Distance (m)	Vertical forces (N)			Time (s)	Distance (m)	Vertical forces (N)			Time (s)	Distance (m)	Vertical forces (N)
0	0	0		0	0	0		0	0	0			0	0	0			0	0	0
0.00092	0.00092	0		0.00092	0.00184	0		0.00042	0.00126	0			0.00092	0.00368	0			0.00042	0.0021	0
0.00192	0.00192	0		0.00192	0.00384	0		0.00044	0.00132	0			0.00192	0.00768	0			0.00092	0.0046	0
0.00292	0.00292	0		0.00292	0.00584	0		0.00092	0.00276	0			0.00292	0.01168	8.18596			0.00142	0.0071	0
0.00392	0.00392	0		0.00392	0.00784	0		0.00142	0.00426	0			0.00392	0.01568	-5.14261			0.00192	0.0096	0
0.00492	0.00492	0		0.00492	0.00984	0		0.00192	0.00576	0			0.00492	0.01968	16.5563			0.00242	0.0121	0
0.00592	0.00592	0		0.00592	0.01184	0.329473		0.0021	0.0063	0			0.00592	0.02368	96.511			0.00292	0.0146	13.4124
0.00692	0.00692	0		0.00692	0.01384	9.26343		0.00242	0.00726	0			0.00692	0.02768	25.236			0.00342	0.0171	25.1768
0.00792	0.00792	0		0.00792	0.01584	23.4421		0.00292	0.00876	0			0.00792	0.03168	65.313			0.00392	0.0196	12.2145
0.00892	0.00892	0		0.00892	0.01784	22.1966		0.00342	0.01026	0			0.00892	0.03568	30.3878			0.00442	0.0221	122.628
0.00992	0.00992	-6.45054		0.00992	0.01984	31.3601		0.00392	0.01176	1.36117			0.00992	0.03968	38.0648			0.00492	0.0246	215.728
0.01092	0.01092	0.342035		0.01092	0.02184	41.7663		0.00442	0.01326	-15.6052			0.01092	0.04368	42.1121			0.00542	0.0271	49.8018
0.01192	0.01192	3.77267		0.01192	0.02384	26.4003		0.00492	0.01476	41.4007			0.01192	0.04768	37.0275			0.00592	0.0296	30.4718
0.01292	0.01292	6.07941		0.01292	0.02584	63.6473		0.00542	0.01626	13.0365			0.01292	0.05168	34.225			0.00642	0.0321	31.7051
0.01392	0.01392	8.14708		0.01392	0.02784	32.1911		0.00592	0.01776	17.3401			0.01392	0.05568	55.3059			0.00692	0.0346	32.6289
0.01492	0.01492	12.6866		0.01492	0.02984	39.1561		0.00642	0.01926	18.9651			0.01492	0.05968	52.9026			0.00742	0.0371	40.0369
0.01592	0.01592	14.7584		0.01592	0.03184	37.5104		0.00692	0.02076	17.3654			0.01592	0.06368	60.1354			0.00792	0.0396	160.448
0.01692	0.01692	16.0397		0.01692	0.03384	40.0221		0.00742	0.02226	49.043			0.01692	0.06768	195.512			0.00842	0.0421	138.274
0.01792	0.01792	17.2448		0.01792	0.03584	36.8022		0.00792	0.02376	28.6349			0.01792	0.07168	79.2574			0.00892	0.0446	75.1276
0.01892	0.01892	16.1245		0.01892	0.03784	14.7735		0.00842	0.02526	24.4459			0.01892	0.07568	50.8694			0.00942	0.0471	67.5095
0.01992	0.01992	17.0374		0.01992	0.03984	45.3889		0.00892	0.02676	30.8262			0.01992	0.07968	44.5912			0.00992	0.0496	59.0434
0.02092	0.02092	17.9237		0.02092	0.04184	36.626		0.00942	0.02826	28.2202			0.02092	0.08368	43.5992			0.01042	0.0521	44.3838
0.02192	0.02192	22.1767		0.02192	0.04384	133.364		0.00992	0.02976	91.5879			0.02192	0.08768	44.8817			0.01092	0.0546	39.1471
0.02292	0.02292	35.0956		0.02292	0.04584	29.2055		0.01042	0.03126	30.4603			0.02292	0.09168	44.3205			0.01142	0.0571	46.8477
0.02392	0.02392	29.7517		0.02392	0.04784	46.1748		0.01092	0.03276	36.0982			0.02392	0.09568	45.4355			0.01192	0.0596	56.1765
0.02492	0.02492	29.1361		0.02492	0.04984	30.079		0.01142	0.03426	43.2837			0.02492	0.09968	62.0502			0.01242	0.0621	58.3692
0.02592	0.02592	29.2575		0.02592	0.05184	29.5538		0.01192	0.03576	47.1173			0.02592	0.10368	45.5476			0.01292	0.0646	68.8312
0.02692	0.02692	29.469		0.02692	0.05384	33.5173		0.01242	0.03726	44.0461			0.02692	0.10768	46.6069			0.01342	0.0671	55.7539
0.02792	0.02792	29.8175		0.02792	0.05584	30.9696		0.01292	0.03876	35.3408			0.02792	0.11168	58.2777			0.01392	0.0696	60.4133
0.02892	0.02892	30.3632		0.02892	0.05784	31.4566		0.01342	0.04026	210.994			0.02892	0.11568	74.6978			0.01442	0.0721	65.5119
0.02992	0.02992	31.7755		0.02992	0.05984	34.0835		0.01392	0.04176	40.7735			0.02992	0.11968	341.695			0.01492	0.0746	59.8114
0.03092	0.03092	28.8107		0.03092	0.06184	42.9465		0.01442	0.04326	44.7853			0.03092	0.12368	79.9321			0.01542	0.0771	51.0171
0.03192	0.03192	29.1522		0.03192	0.06384	35.2273		0.01492	0.04476	39.0336			0.03192	0.12768	69.8851			0.01592	0.0796	39.9202
0.03292	0.03292	29.6369		0.03292	0.06584	36.5689		0.01542	0.04626	31.5328			0.03292	0.13168	59.8902			0.01642	0.0821	48.9413
0.03392	0.03392	26.6619		0.03392	0.06784	36.32		0.01592	0.04776	26.6732								0.01692	0.0846	42.2061
0.03492	0.03492	26.5399		0.03492	0.06984	36.9296		0.01642	0.04926	26.1463								0.01742	0.0871	226.066
0.03592	0.03592	27.4723		0.03592	0.07184	37.6067		0.01692	0.05076	29.0239								0.01792	0.0896	44.3072
0.03692	0.03692	26.3156		0.03692	0.07384	29.409		0.01742	0.05226	41.6729								0.01842	0.0921	71.2349
0.03792	0.03792	21.6743		0.03792	0.07584	27.252		0.01792	0.05376	39.7581								0.01892	0.0946	60.5108
0.03892	0.03892	24.2434		0.03892	0.07784	33.222		0.01842	0.05526	45.3686								0.01942	0.0971	50.8648
0.03992	0.03992	27.402		0.03992	0.07984	31.792		0.01892	0.05676	39.4068								0.01992	0.0996	42.0471
0.04092	0.04092	24.1705		0.04092	0.08184	22.1012		0.01942	0.05826	37.1566								0.02042	0.1021	157.658
0.04192	0.04192	20.7739		0.04192	0.08384	23.5304		0.01992	0.05976	39.1632								0.02092	0.1046	44.5126
0.04292	0.04292	18.4449		0.04292	0.08584	23.9446		0.02012	0.06036	40.0112								0.02142	0.1071	44.4161
0.04392	0.04392	20.3664		0.04392	0.08784	25.3021		0.02042	0.06126	43.8106								0.02192	0.1096	66.6713
0.04492	0.04492	19.2265		0.04492	0.08984	31.0021		0.02092	0.06276	44.1317								0.02242	0.1121	50.5083
0.04592	0.04592	19.6215		0.04592	0.09184	36.4876		0.02142	0.06426	88.2066								0.02292	0.1146	71.4937
0.04692	0.04692	23.6561		0.04692	0.09384	42.647		0.02192	0.06576	63.2595								0.02342	0.1171	88.4207
0.04792	0.04792	22.0392		0.04792	0.09584	41.3198		0.02242	0.06726	55.8245								0.02392	0.1196	102.297
0.04892	0.04892	21.6006		0.04892	0.09784	44.8853		0.02292	0.06876	51.7301								0.02442	0.1221	90.5863
0.04992	0.04992	25.2939		0.04992	0.09984	38.0419		0.02342	0.07026	43.4777
0.05092	0.05092	22.7827		0.05092	0.10184	35.3232		0.02392	0.07176	43.5875
0.05192	0.05192	21.8161		0.05192	0.10384	32.4256		0.02442	0.07326	41.6555
0.05292	0.05292	22.6384		0.05292	0.10584	38.9143		0.02492	0.07476	44.3398
0.05392	0.05392	21.3679		0.05392	0.10784	37.4159		0.02542	0.07626	46.8048
0.05492	0.05492	20.0279		0.05492	0.10984	41.7181		0.02592	0.07776	41.2439
0.05592	0.05592	21.8961		0.05592	0.11184	41.9382		0.02642	0.07926	39.17
0.05692	0.05692	22.1412		0.05692	0.11384	45.1046		0.02692	0.08076	35.353
0.05792	0.05792	18.9496		0.05792	0.11584	41.688		0.02742	0.08226	32.4974
0.05892	0.05892	17.7817		0.05892	0.11784	41.2017		0.02792	0.08376	42.7147
0.05992	0.05992	18.8216		0.05992	0.11984	36.6378		0.02842	0.08526	45.6532
0.06092	0.06092	16.842		0.06092	0.12184	45.6334		0.02892	0.08676	37.4702
0.06192	0.06192	16.0271		0.06192	0.12384	44.2874		0.02942	0.08826	35.0423
0.06292	0.06292	17.6813		0.06292	0.12584	46.6764		0.0295	0.0885	34.6842
0.06392	0.06392	18.1662		0.06392	0.12784	41.26		0.02992	0.08976	41.1228
0.06492	0.06492	21.1373		0.06492	0.12984	37.1147		0.03042	0.09126	43.223
0.06592	0.06592	21.6391		0.06592	0.13184	34.8259		0.03092	0.09276	38.2535
0.06692	0.06692	20.1458		0.06692	0.13384	36.6423		0.03142	0.09426	31.0629
0.06792	0.06792	22.3927		0.06792	0.13584	40.0667		0.03192	0.09576	77.2633
0.06892	0.06892	21.2433		0.06892	0.13784	39.8814		0.03242	0.09726	28.9132
0.06992	0.06992	21.2922		0.06992	0.13984	44.4842		0.03292	0.09876	36.3954
0.07092	0.07092	23.084		0.07092	0.14184	44.5347		0.03342	0.10026	39.4927
0.07192	0.07192	22.3169		0.07192	0.14384	47.3567		0.03392	0.10176	33.0287
0.07292	0.07292	24.1966		0.07292	0.14584	38.0845		0.03442	0.10326	32.3085
0.07392	0.07392	26.0724		0.07392	0.14784	40.418		0.03492	0.10476	78.1048
0.07492	0.07492	28.1744		0.07492	0.14984	41.36		0.03542	0.10626	48.4488
0.07592	0.07592	25.9105		0.07592	0.15184	43.0964		0.03592	0.10776	43.8864
0.07692	0.07692	23.8966		0.07692	0.15384	47.5796		0.03598	0.10794	44.8443
0.07792	0.07792	22.5408		0.07792	0.15584	46.0249		0.03642	0.10926	53.5586
0.07892	0.07892	20.7388		0.07892	0.15784	44.028		0.03692	0.11076	58.8302
0.07992	0.07992	17.2676		0.07992	0.15984	45.4202		0.03742	0.11226	59.1597
0.08092	0.08092	18.0249		0.08092	0.16184	41.1415		0.03792	0.11376	50.2242
0.08192	0.08192	17.5645		0.08192	0.16384	38.3949		0.03842	0.11526	35.8979
0.08292	0.08292	16.9814		0.08292	0.16584	36.0205		0.03892	0.11676	35.0729
0.08392	0.08392	20.5384		0.08392	0.16784	34.8181		0.03942	0.11826	39.238
0.08492	0.08492	24.0322		0.08492	0.16984	40.6841		0.03992	0.11976	45.2209
0.08592	0.08592	26.8429		0.08592	0.17184	33.5528		0.04042	0.12126	109.614
0.08692	0.08692	25.5542		0.08692	0.17384	25.8736		0.04092	0.12276	61.7577
0.08792	0.08792	24.9462		0.08792	0.17584	76.1362		0.04142	0.12426	112.699
0.08892	0.08892	23.5872		0.08892	0.17784	32.0764		0.04192	0.12576	56.3963
0.08992	0.08992	27.2987		0.08992	0.17984	34.5408		0.04242	0.12726	51.2237
0.09092	0.09092	27.1912		0.09092	0.18184	46.1731		0.04292	0.12876	58.5754
0.09192	0.09192	26.4372		0.09192	0.18384	44.7471		0.04342	0.13026	56.8913
0.09292	0.09292	23.1723		0.09292	0.18584	36.7045		0.04392	0.13176	62.6646
0.09392	0.09392	25.1956		0.09392	0.18784	45.1955		0.04442	0.13326	65.4978
0.09492	0.09492	19.335		0.09492	0.18984	45.1892		0.04492	0.13476	60.7277
0.09592	0.09592	23.2009		0.09592	0.19184	40.4484		0.04542	0.13626	56.1393
0.09692	0.09692	22.1673		0.09692	0.19384	50.7527		0.04592	0.13776	52.1928
0.09792	0.09792	23.4032		0.09792	0.19584	42.4605		0.04642	0.13926	69.5115
0.09892	0.09892	21.8828		0.09892	0.19784	49.3621		0.04692	0.14076	48.2185
0.09992	0.09992	22.7272		0.09992	0.19984	52.4762		0.04742	0.14226	46.7799
0.10092	0.10092	19.9399		0.10092	0.20184	50.9669		0.04792	0.14376	44.5198
0.10192	0.10192	26.0845		0.10192	0.20384	46.4193		0.04842	0.14526	36.6847
0.10292	0.10292	27.021		0.10292	0.20584	44.7719		0.04892	0.14676	33.6275
0.10392	0.10392	28.8573		0.10392	0.20784	45.5282		0.04942	0.14826	43.4265
0.10492	0.10492	31.3641		0.10492	0.20984	56.5951		0.04992	0.14976	86.0415
0.10592	0.10592	31.327		0.10592	0.21184	51.8025		0.05042	0.15126	47.2487
0.10692	0.10692	28.6064		0.10692	0.21384	54.7571		0.05092	0.15276	43.1865
0.10792	0.10792	32.0262		0.10792	0.21584	53.1333		0.05142	0.15426	46.391
0.10892	0.10892	26.5568		0.10892	0.21784	53.3665		0.05192	0.15576	47.7815
0.10992	0.10992	28.5837		0.10992	0.21984	48.2457		0.05242	0.15726	157.318
0.11092	0.11092	29.6522		0.11092	0.22184	47.2341		0.05292	0.15876	60.162
0.11192	0.11192	24.5155		0.11192	0.22384	70.1224		0.05342	0.16026	42.7334
0.11292	0.11292	31.295		0.11292	0.22584	56.5365		0.05392	0.16176	44.0362
								0.05442	0.16326	45.2203
								0.05492	0.16476	42.4504
								0.05542	0.16626	45.7596
								0.05592	0.16776	48.4344
								0.05642	0.16926	47.7068
