# Supplementary material for: Study on the Interaction between Soil and the Five-Claw Combination of a Mole Using the Discrete Element Method
Source: Appl Bionics Biomech. 2018 Aug 6;2018:7854052. doi: 10.1155/2018/7854052 (PMC6109513; doi:10.1155/2018/7854052)
Supplement: Supplementary 5 — Table S5: the soil rupture distance ratio affected by rake angles. The soil rupture distance ratio (m) obtained from the simulation at the rake angles of 30°, 50°, 70°, and 90°. [file 7854052.f5.xlsx]

## Sheet: Sheet1
Rake angle	Soil rupture distance (mm)	Working depth (mm)	Soil rupture distance ratio
30°	144.32	45	3.20711
50°	117.52	45	2.61156
70°	88.98	45	1.97733
90°	84.56	45	1.87911
