# Supplementary material for: Study on the Interaction between Soil and the Five-Claw Combination of a Mole Using the Discrete Element Method
Source: Appl Bionics Biomech. 2018 Aug 6;2018:7854052. doi: 10.1155/2018/7854052 (PMC6109513; doi:10.1155/2018/7854052)
Supplement: Supplementary 6 — Table S6: the soil rupture distance ratio affected by speeds. The soil rupture distance ratio (m) obtained from the simulation at the speeds of 1, 2, 3, 4, and 5 m/s. [file 7854052.f6.xlsx]

## Sheet: Sheet1
Speed (m/s)	Soil rupture distance (mm)	Working depth (mm)	Soil rupture distance ratio
1	100.23	45	2.22733
2	92.05	45	2.04556
3	88.98	45	1.97733
4	82.84	45	1.84089
5	79.77	45	1.77267
