# Supplementary material for: Study on the Interaction between Soil and the Five-Claw Combination of a Mole Using the Discrete Element Method
Source: Appl Bionics Biomech. 2018 Aug 6;2018:7854052. doi: 10.1155/2018/7854052 (PMC6109513; doi:10.1155/2018/7854052)
Supplement: Supplementary 7 — Figure S7: statistical analysis of the correlation of the soil rupture distance ratio between the simulation and prediction. The soil rupture distance ratio (m) of simulations matched with the corresponding values predicted by Hettiaratchi et al. [9] at different rake angles. [file 7854052.f7.xlsx]

## Sheet:  m of simulation and prediction
The correlation of the soil rupture distance ratio (m) between the simulation and prediction
m of prediction	m of simulation
3.5	3.5
2.8	2.9
2.7	2.6
3	2.9
