# Supplementary material for: Study on the Interaction between Soil and the Five-Claw Combination of a Mole Using the Discrete Element Method
Source: Appl Bionics Biomech. 2018 Aug 6;2018:7854052. doi: 10.1155/2018/7854052 (PMC6109513; doi:10.1155/2018/7854052)
Supplement: Supplementary 8 — Figure S8: statistical analysis of the draught and vertical forces of the five-claw combination affected by rake angles. The draught and vertical forces varied with the rake angle in the range of 10° to 90°. [file 7854052.f8.xlsx]

## Sheet: The draught and vertical forces
The draught and vertical forces of five-claw combination affected by rake angle
Rake angle (deg)	Draught force (N)	Vertical force (N)
10	202	35.9
30	158	-18.2
50	162	0.89
70	195	23.58
90	261	41.13
