# Supplementary material for: Study on the Interaction between Soil and the Five-Claw Combination of a Mole Using the Discrete Element Method
Source: Appl Bionics Biomech. 2018 Aug 6;2018:7854052. doi: 10.1155/2018/7854052 (PMC6109513; doi:10.1155/2018/7854052)
Supplement: Supplementary 9 — Figure S9: statistical analysis of the draught and vertical forces of the five-claw combination affected by speeds. The draught and vertical forces varied with the speed increasing from 1 to 5 m/s. [file 7854052.f9.xlsx]

## Sheet: The draught and vertical forces
The draught and vertical forces of five-claw combination affected by speed
Speed (m/s)	Draught force (N)	Vertical force (N)
1	100	22
2	154	33
3	261	43.88
4	329	58
5	409	68
