# Supplementary material for: Study on the Interaction between Soil and the Five-Claw Combination of a Mole Using the Discrete Element Method
Source: Appl Bionics Biomech. 2018 Aug 6;2018:7854052. doi: 10.1155/2018/7854052 (PMC6109513; doi:10.1155/2018/7854052)
Supplement: Supplementary 10 — Figure S10: statistical analysis of the soil rupture distance ratio of five-claw combination affected by rake angles. The soil rupture distance ratio (m) of simulations and predictions varied with the rake angle in the range of 30° to 90°. [file 7854052.f10.xlsx]

## Sheet: Sheet1
Rake angle (deg)	Simulation	Prediction
10
30	3.2	3.5
50	2.6	2.8
70	2	2.7
90	1.9	3
