# Supplementary material for: Study on the Interaction between Soil and the Five-Claw Combination of a Mole Using the Discrete Element Method
Source: Appl Bionics Biomech. 2018 Aug 6;2018:7854052. doi: 10.1155/2018/7854052 (PMC6109513; doi:10.1155/2018/7854052)
Supplement: Supplementary 11 — Figure S11: statistical analysis of the soil rupture distance ratio of the five-claw combination affected by speeds. The soil rupture distance ratio (m) of simulations and predictions varied with the speed in the range of 1 to 5 m/s. [file 7854052.f11.xlsx]

## Sheet: m affected by speed
The soil rupture distance ratio of five-claw combination affected by speed
Speed (m/s)	m
1	2.22727
2	2.04545
3	1.97727
4	1.84091
5	1.77273
